# Supplementary material for: The Virucidal Effect of the Chlorination of Water at the Initial Phase of Disinfection May Be Underestimated If Contact Time Calculations Are Used
Source: MDPI journal article supplement (doi:10.3390/pathogens12101216), 2023-10-03
Supplement: s1 [file s1]

## Supplementary

**Table S1.** Analysis of the kinetic of chlorine adsorption in the two cell media by addition of different indicated amounts of chlorine. Media substrates were diluted 1:1000 ratio before tested.

| NaOCl (VOL) in 5 l | Media                 | (mg/l)        | Time (min) |      |      |      |      |      |      |      |      |
|--------------------|-----------------------|---------------|------------|------|------|------|------|------|------|------|------|
|                    |                       |               | 0          | 2    | 6    | 14   | 18   | 53   | 57   | 123  | 127  |
| 6A (50 µl)         | Ultra-filtrated Water | Free chlorine | 0.98       | 0.98 |      | 0.82 |      | 0.69 |      | 0.64 |      |
|                    | MEM substrate         | Free chlorine | 0.98       |      | 0.39 |      | 0.31 |      | 0.12 |      | 0.08 |
|                    | M119 substrate        | Free chlorine | 0.98       |      | 0.27 |      | 0.23 |      | 0.11 |      | 0.06 |
| 6B (60 µl)         | Ultra-filtrated Water | Free chlorine | 1.31       | 1.22 |      | 1.08 |      | 1.05 |      | 1.00 |      |
|                    | MEM substrate         | Free chlorine | 1.32       |      | 0.60 |      | 0.28 |      | 0.18 |      | 0.12 |
|                    | M119 substrate        | Free chlorine | 1.29       |      | 0.54 |      | 0.28 |      | 0.19 |      | 0.13 |
| 6C (65 µl)         | Ultra-filtrated Water | Free chlorine | 0.65       | 0.57 |      |      |      |      | 0.48 | 0.46 |      |
|                    | MEM substrate         | Free chlorine | 0.72       |      | 0.07 | 0.07 | 0.06 |      |      | 0.05 |      |
|                    | M119 substrate        | Free chlorine | 0.71       |      | 0.14 |      | 0.08 | 0.06 |      |      | 0.05 |

**Table S2.** Analysis of the concentration of chlorine dioxide by the two different cell media by addition of 0.17 mg ClO<sub>2</sub>/l. media substrates were diluted 1:1000 ratio before tested.

| Media                 | Disinfectant residual (mg/l) | Time (min) |       |       |       |       |       |       |       |       |       |       |       |       |
|-----------------------|------------------------------|------------|-------|-------|-------|-------|-------|-------|-------|-------|-------|-------|-------|-------|
|                       |                              | 0          | 3     | 6     | 10    | 27    | 31    | 35    | 91    | 95    | 99    | 132   | 135   | 140   |
| M119 substrate        | ClO <sub>2</sub>             | 0.16       |       |       | 0.136 |       |       | 0.101 |       |       | 0.074 |       |       | 0.075 |
| MEM substrate         | ClO <sub>2</sub>             | 0.16       |       | 0.132 |       |       | 0.129 |       |       | 0.091 |       |       | 0.077 |       |
| Ultra-filtrated Water | ClO <sub>2</sub>             | 0.17       | 0.135 |       |       | 0.120 |       |       | 0.103 |       |       | 0.090 |       |       |

**Table S3.** The total Chlorine dioxide and Chlorine concentrations calculated in water suspension with echovirus 30, simian rotavirus and adenovirus type 2 at 0, 2,10, 30, 60, and 120 minutes. The mean transmittance (254nm) was 91.4% and TOC was 2.4 mg/l before the start of the experiments. The pH and temperatures are given at the beginning and end of the experiments.

| Virus           | Disinfectants (mg/l) | Free chlorine after treatment (minutes) |         |      |      |      |      |      |      |      |       |
|-----------------|----------------------|-----------------------------------------|---------|------|------|------|------|------|------|------|-------|
|                 |                      | pH                                      | temp    | 0    | 2    | 3    | 6    | 10   | 30   | 60   | 120   |
| Echovirus exp1  | Chlorine dioxide     | 6.7-6.7                                 | 12C-21C | 0.53 | 0.20 |      |      | 0.26 | 0.17 | 0.11 | 0.07  |
|                 | Chlorine             | 6.7-6.8                                 | 12C-16C | 1.31 | 0.37 | 0.17 | 0.16 | 0.18 | 0.15 | 0.   | 0.12  |
| Echovirus exp2  | Chlorine dioxide     | 6.7-6.7                                 | 9C-16C  | 0.53 | 0.26 |      |      | 0.18 | 0.17 | 0.13 | 0.09  |
|                 | Chlorine             | 6.8-6.8                                 | 9C-16C  | 1.31 | 0.5  |      |      | 0.29 | 0.21 | 0.11 | 0.11  |
| Rotavirus Exp1  | Chlorine dioxide     | 6.7-6.8                                 | 9C-19C  | 0.49 |      | 0.25 |      | 0.09 |      | 0.09 | <0.03 |
|                 | Chlorine             | 6.7-6.8                                 | 9C-19C  | 1.2  | 0.53 |      |      | 0.41 | 0.25 | 0.14 | 0.10  |
| Rotavirus exp2  | Chlorine dioxide     | 6.7-6.7                                 | 9C-20C  | 0.52 |      | 0.16 |      | 0.29 | 0.19 | 0.12 | 0.06  |
|                 | Chlorine             | 6.7-6.7                                 | 9C-20C  | 1.13 | 0.44 |      |      | 0.31 | 0.18 | 0.14 | 0.11  |
| Adenovirus exp1 | Chlorine dioxide     | 6.7-6.7                                 | 8C-17C  | 0.47 | 0.25 |      |      | 0.22 | 0.16 | 0.10 | <0.03 |
|                 | Chlorine             | 6.7-6.9                                 | 8C-17C  | 1.31 | 0.55 |      |      | 0.32 | 0.15 | 0.10 | 0.08  |
| Adenovirus Exp2 | Chlorine dioxide     | 6.7-6.7                                 | 8C-19C  | 0.56 | 0.35 |      |      |      | 0.21 | 0.21 | 0.08  |
|                 | Chlorine             | 6.7-6.8                                 | 7C-13C  | 1.31 | 0.35 |      |      | 0.21 | 0.14 | 0.12 | 0.12  |

**Table S4.** Primers and probes used for qPCR detection of E30. R. and HAdV2.

| Primers         | Primer Sequences                             | Reference            |
|-----------------|----------------------------------------------|----------------------|
| E30-forward     | TCCTCCGGCCCCCTGAATGCG                        | (Wang et al., 2020b) |
| E30-reverse1    | ACCGGATGGCCAATCCAA                           | (Wang et al., 2020b) |
| E30-reverse2    | ATGTCACCATAAGCAGCCA                          | (Wang et al., 2020b) |
| E30-probe       | CGGAACCGACTACTTTGGGTGIC                      | (Wang et al., 2020b) |
| RV SA11-forward | ACC ATC TWC ACR TRA CCC TCT ATG AGA          | (Zeng et al., 2008)  |
| RV SA11-reverse | GGT CAC ATA ACG CCC CTA TAG C                | (Zeng et al., 2008)  |
| RV SA11-probe   | [FAM] AGT TAA AAG CTA ACA CTG TCA AA [MGBEQ] | (Zeng et al., 2008)  |
| HAdV2-forward   | GCCACGGTGGGGTTTCTAAACTT                      | (Wang et al., 2018)  |
| HAdV2-reverse   | GCCCCAGTGGTCTTACATGCACATC                    | (Wang et al., 2018)  |
| HAdV2-probe     | TGCACCAGACCCGGGCTCAGGTACTCCGA                | (Wang et al., 2018)  |
